# Supplementary material
Source: PubMed Central journal article supplement (PMC5198835)
Supplement: NIHMS825735-supplement-Figure_S1.pdf [file NIHMS825735-supplement-Figure_S1.pdf]

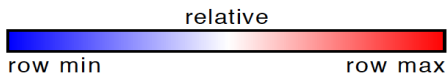

DASA  
DASA  
DASA  
DMSO  
DMSO  
DMSO  
DASA+LPS  
DASA+LPS  
DASA+LPS  
DMSO+LPS  
DMSO+LPS  
DMSO+LPS

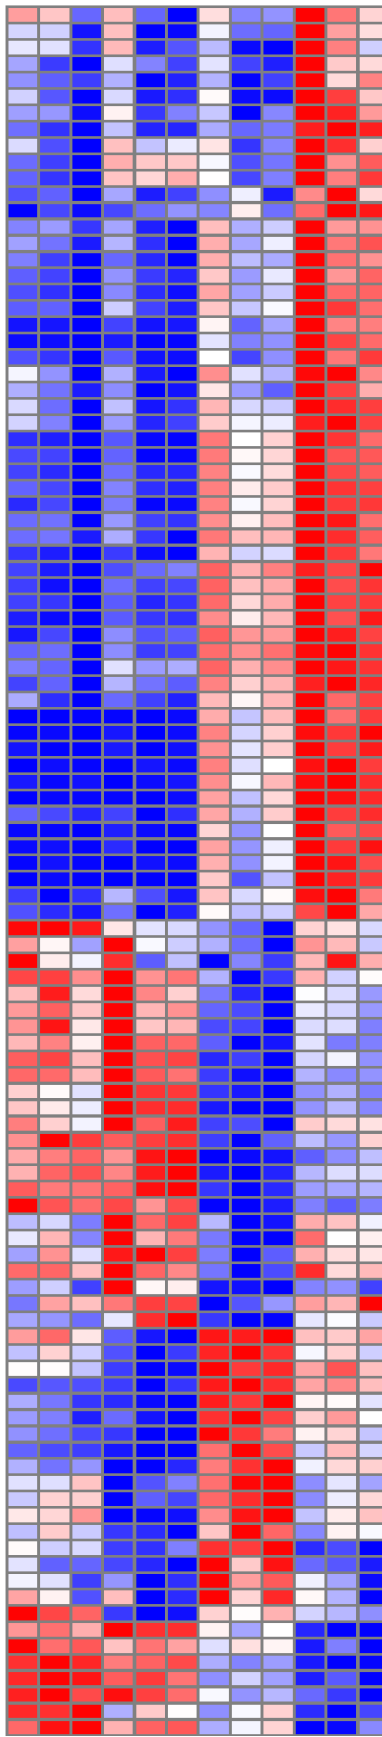

Id

Trafd1  
Rassf1  
Stard3  
Samhd1  
Bcl2l11  
Gm885  
Tor1aip1  
Cd80  
BC023892  
Cd86  
Cd86  
Siglec1  
Fcgr1  
Pfkfb  
Tor3a  
Fmnl2  
Daxx  
Tes  
Tpst1  
Rgs16  
Il20rb  
Dscr1  
Ccadc41  
Cdk2ap2  
Cd52  
9030625A04Rik  
Enpp4  
Tap1  
Al451617  
Mitd1  
Dusp16  
Sp100  
Znfx1  
Batf2  
Slc15a3  
Trex1  
Igtg  
EG240327  
Rnf213  
Eif2ak2  
Ilgp2  
Slc7a8  
Ube1l  
Oasl1  
Ccl7  
Cxcl10  
Oas3  
Spint1  
Upp1  
Plaur  
Mx2  
Gpr109a  
Upp1  
Upp1  
Spata13  
A130019H11Rik  
Vim  
BC013712  
E130207H16Rik  
1500012F01Rik  
Myo1e  
Lpxn  
Adam8  
Cd83  
Cyth4  
Ehd4  
Txnip  
Txnip  
FCGR3A  
Emp1  
Dpep2  
Mertk  
Dpep2  
F630001K14Rik  
Dab2  
Al607873  
Nrap  
Bcl2l11  
Ccr5  
Stap1  
Tgm2  
Ampd3  
Hmox1  
Sqle  
Tpi1  
Ednrb  
Pgm2  
Nsdhl  
Acat2  
Acss2  
Aldoc  
Col18a1  
Gsta3  
Kif3c  
Mt1  
Ltc4s  
Hsd3b7  
Hsd3b7  
Panx1  
Arhgap22  
Ugt1a10  
Gpnm  
Sort1  
Cd68  
Cbr3  
Gpr137b-ps
